# Supplementary material for: Characterization of a Chinese lignite and the corresponding derivatives using direct analysis in real time quadrupole time-of-flight mass spectrometry
Source: Royal Society of Chemistry journal article supplement (doi:10.1039/c6ra23899h), 2016-01-01
Supplement: c6ra23899h1.pdf [file c6ra23899h1.pdf]

Characterization of a Chinese lignite and the corresponding derivatives  
using direct analysis in real time quadrupole time-of-flight mass  
spectrometry

Xing Fan,<sup>\*ab</sup> Chu-Fan Wang,<sup>a</sup> Chun-Yan You,<sup>a</sup> Xian-Yong Wei,<sup>a</sup> Lu Chen,<sup>a</sup> Jing-Pei  
Cao,<sup>a</sup> Yun-Peng Zhao,<sup>a</sup> Wei Zhao,<sup>a</sup> Yu-Gao Wang,<sup>\*c</sup> Jin-Li Lu<sup>d</sup>

<sup>a</sup>*Key Laboratory of Coal Processing and Efficient Utilization, Ministry of Education,  
China University of Mining & Technology, Xuzhou, Jiangsu 221116, China*

<sup>b</sup>*Key Laboratory for Mass Spectrometry and Instrumentation, East China Institute of  
Technology, Nanchang, Jiangxi 330013, China*

<sup>c</sup>*College of Chemistry and Chemical Engineering, Taiyuan University of Technology,  
Taiyuan 030024, Shanxi, China*

<sup>d</sup>*News Center of CUMT, China University of Mining & Technology, Jiangsu 221116,  
China*

\* Corresponding author Xing Fan at: School of Chemical Engineering and  
Technology, China University of Mining & Technology, Xuzhou, Jiangsu 221116,  
China. Tel.: +86-516-83885951; E-mail: fanxing@cumt.edu.cn; Yu-Gao Wang at:  
College of Chemistry and Chemical Engineering, Taiyuan University of Technology,  
Taiyuan, Shanxi 030024, China. +86-13653602168; E-mail: wyg\_cumt@163.com

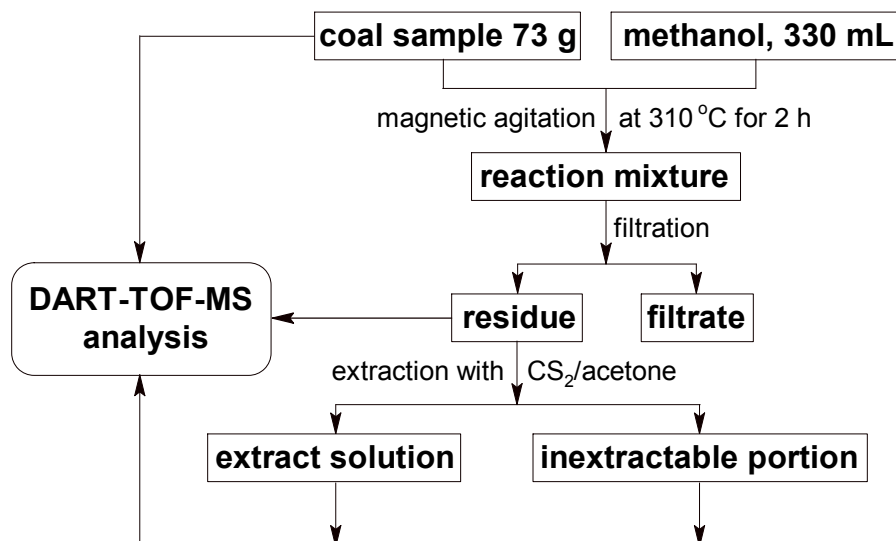

Figure S1 The experimental procedure

Table S1 Fragments of the precursor ion at  $m/z$  680.48

| Measure $m/z$ | Ion species                       | Calculated $m/z$ | Calculated molecular weight (u) | Formula                                                       | Mass error (ppm) |
|---------------|-----------------------------------|------------------|---------------------------------|---------------------------------------------------------------|------------------|
| 383.13769     | (M+H) <sup>+</sup>                | 383.13902        | 382.13174                       | C <sub>24</sub> H <sub>18</sub> N <sub>2</sub> O <sub>3</sub> | 2.48             |
| 439.20074     | (M+H) <sup>+</sup>                | 439.20162        | 438.19434                       | C <sub>28</sub> H <sub>26</sub> N <sub>2</sub> O <sub>3</sub> | 2.05             |
| 495.26534     | (M+H) <sup>+</sup>                | 495.26422        | 494.25806                       | C <sub>32</sub> H <sub>34</sub> N <sub>2</sub> O <sub>3</sub> | -2.27            |
| 551.32649     | (M+H) <sup>+</sup>                | 551.32682        | 550.31921                       | C <sub>36</sub> H <sub>42</sub> N <sub>2</sub> O <sub>3</sub> | 0.6              |
| 607.39011     | (M+H) <sup>+</sup>                | 607.38942        | 606.38214                       | C <sub>40</sub> H <sub>50</sub> N <sub>2</sub> O <sub>3</sub> | -1.14            |
| 663.45352     | (M+H) <sup>+</sup>                | 663.45202        | 662.44474                       | C <sub>44</sub> H <sub>58</sub> N <sub>2</sub> O <sub>3</sub> | -2.26            |
| 680.48000     | (M+NH <sub>4</sub> ) <sup>+</sup> | 680.47857        | 678.44474                       | C <sub>44</sub> H <sub>58</sub> N <sub>2</sub> O <sub>3</sub> | -2.16            |
